# Supplementary material
Source: publisher site journal article supplement (https://www.spandidos-publications.com/5306/downloadSupplementary)

Figure S1. Hematoxylin and eosin staining of the stomach. Cancer cells proliferated mucosally and invaded the submucosa. Lymphatic and venous invasions were also observed (magnification, x20; scale bar, 1 mm).

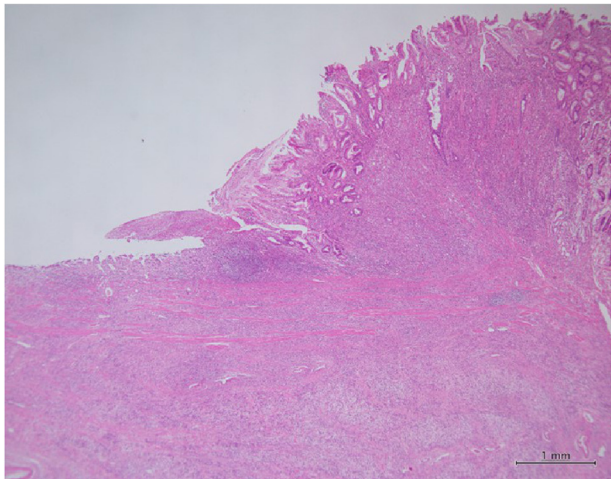

Supplement: Supplementary file 1 [file downloadSupplementary]
